# Supplementary material
Source: publisher site journal article supplement (https://kjim.org/upload/media/kjim-2017-370-suppl1.pdf)
Supplement: Supplementary file 1 [file kjim-2017-370-suppl1.pdf]

**Supplementary Table 1. Number of acute erosions at 8 weeks after treatment**

| Variable                                                                   | Test group (n = 39) | Control group (n = 37) | p value <sup>a</sup> |
|----------------------------------------------------------------------------|---------------------|------------------------|----------------------|
| <b>Stomach</b>                                                             |                     |                        |                      |
| Mean ± SD                                                                  | 0.79 ± 1.82         | 1.05 ± 1.96            | 0.6021               |
| Median                                                                     | 0                   | 0                      |                      |
| Min–Max                                                                    | 0–9.00              | 0–7.00                 |                      |
| <b>Duodenum</b>                                                            |                     |                        |                      |
| Mean ± SD                                                                  | 0                   | 0.14 ± 0.82            | 0.3171               |
| Median                                                                     | 0                   | 0                      |                      |
| Min–Max                                                                    | 0–0                 | 0–5.00                 |                      |
| <b>Stomach + duodenum</b>                                                  |                     |                        |                      |
| Mean ± SD                                                                  | 0.79 ± 1.82         | 1.19 ± 2.42            | 0.5884               |
| Median                                                                     | 0                   | 0                      |                      |
| Min–Max                                                                    | 0–9.00              | 0–11.00                |                      |
| <b>Institute investigator vs. independent evaluator 1 concordance rate</b> |                     |                        |                      |
| <b>Intraclass correlation coefficient</b>                                  |                     |                        |                      |
| Stomach                                                                    | 0.610               |                        |                      |
| Duodenum                                                                   | 0.663               |                        |                      |
| <b>Institute investigator vs. independent evaluator 2 concordance rate</b> |                     |                        |                      |
| <b>Intraclass correlation coefficient</b>                                  |                     |                        |                      |
| Stomach                                                                    | 0.564               |                        |                      |
| Duodenum                                                                   | 0.692               |                        |                      |

Test group, irsogladine maleate (Gaslon N<sup>®</sup> OD), 2 mg twice a day; Control group, placebo drug of irsogladine maleate 2 mg twice a day. SD, standard deviation.

<sup>a</sup>Intergroup comparison: Wilcoxon rank sum test.
